# Supplementary material for: Human transcription factor protein interaction networks
Source: PubMed Central journal article supplement (PMC8828895; doi:10.1038/s41467-022-28341-5), 2022-02-09
Supplement: 41467_2022_28341_MOESM1_ESM.pdf [file 41467_2022_28341_MOESM1_ESM.pdf]

# Supplementary Figures

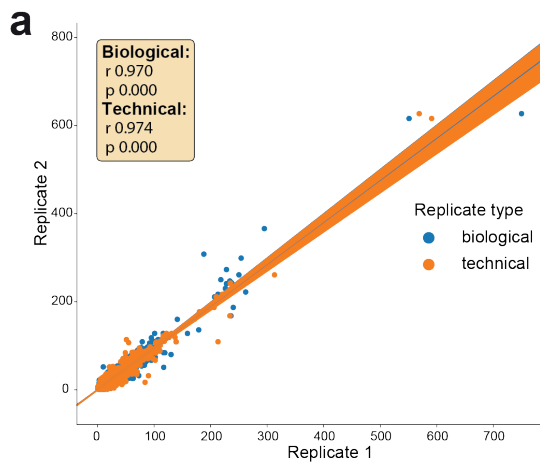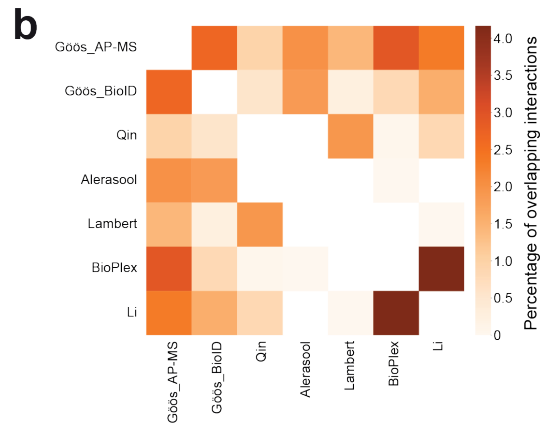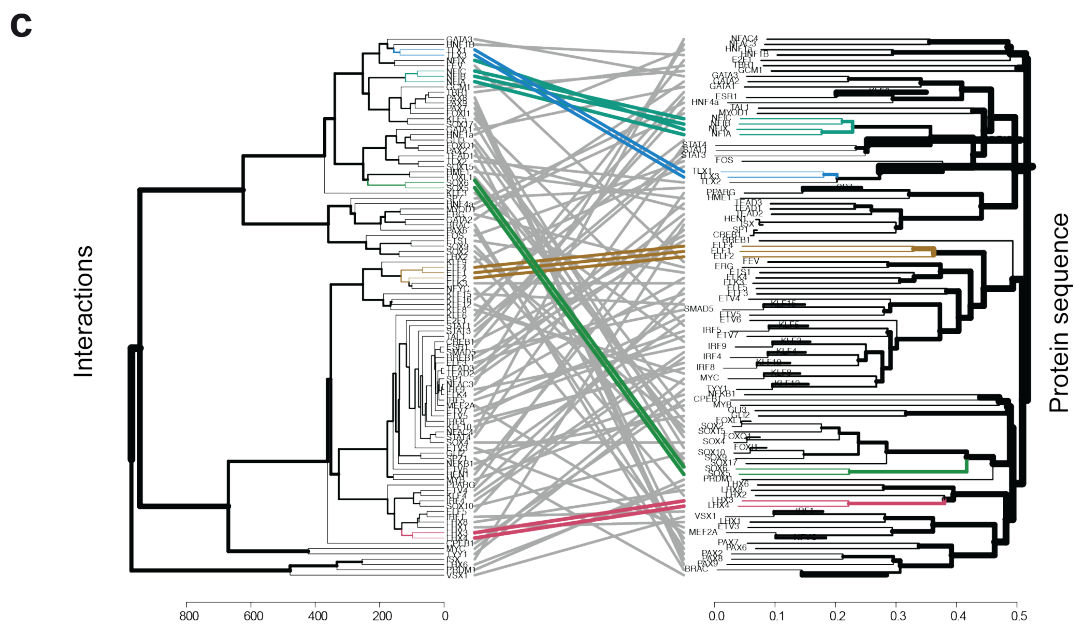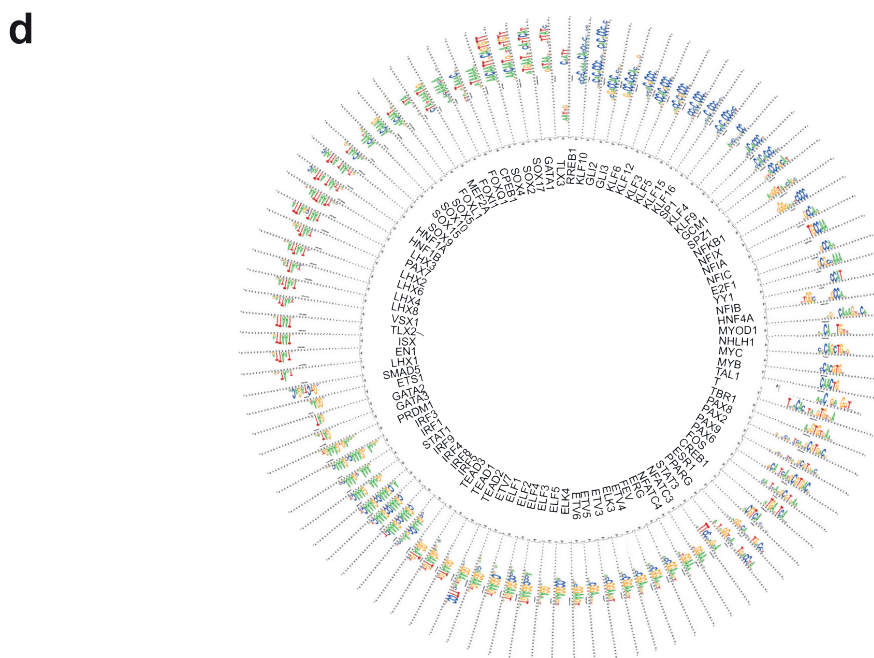

**Supplementary Figure 1. DNA-binding motif alignment of studied TFs and its correlations to bait-prey clustering.** **a** Correlation plots of biological (blue) and technical (orange) replicates performed with *seaborn* and *scipy* python packages. Correlation coefficient  $r$  for each of the replicate types is shown in the box in top left corner. **b** Heatmap of bait-prey interaction overlap between data presented in this paper (Göös\_APMS, Göös\_BioID), BioPlex, and four other large-scale transcription factor interactome studies. Values shown refer to the percentage of overlapping interactions, and sets were not compared against themselves to preserve contrast. **c** Comparison of TF interaction clustering and full-length amino acid sequence alignment by *dendexted* R package. TF groups with significant correlation between PPI clustering and full-length amino acid sequence are colour coded. **d** TFs were aligned by DNA-binding motifs (JASPAR, HT-SELEX and ENCODE) using RSAT. Source data of the figure are provided as a Source Data file.

**a**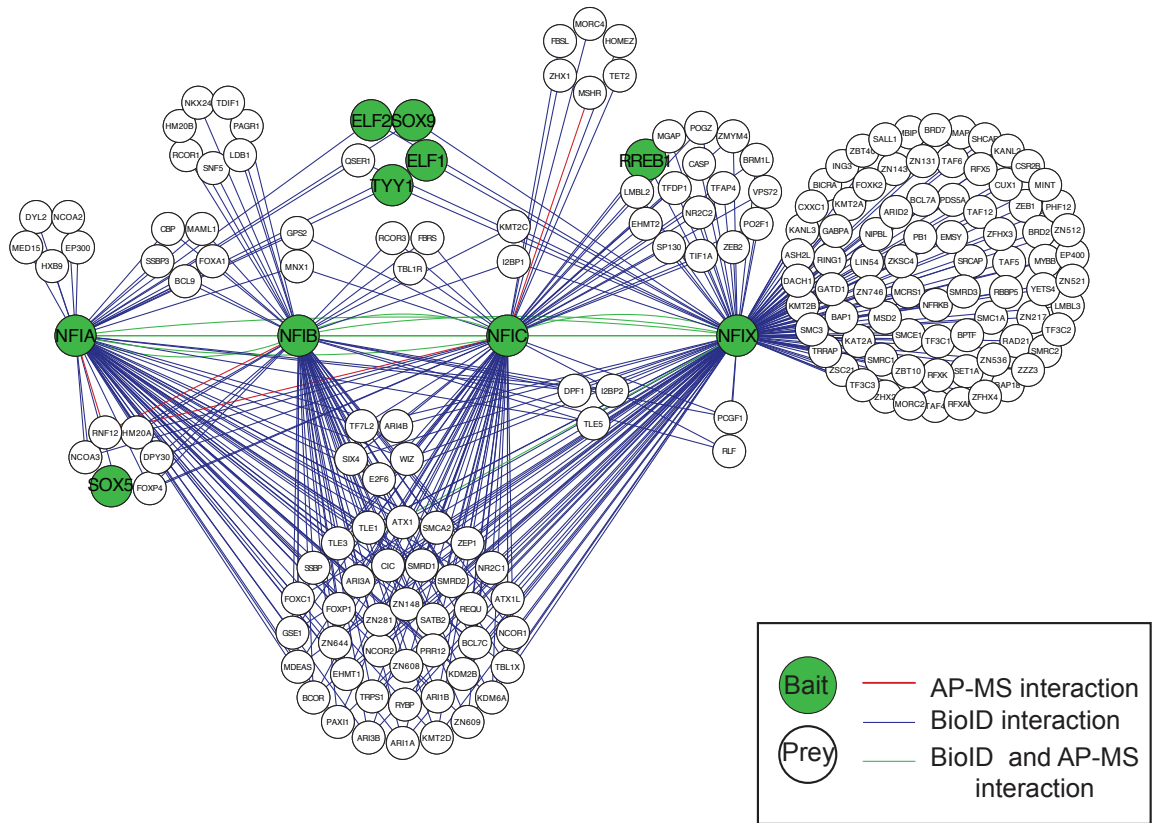**b**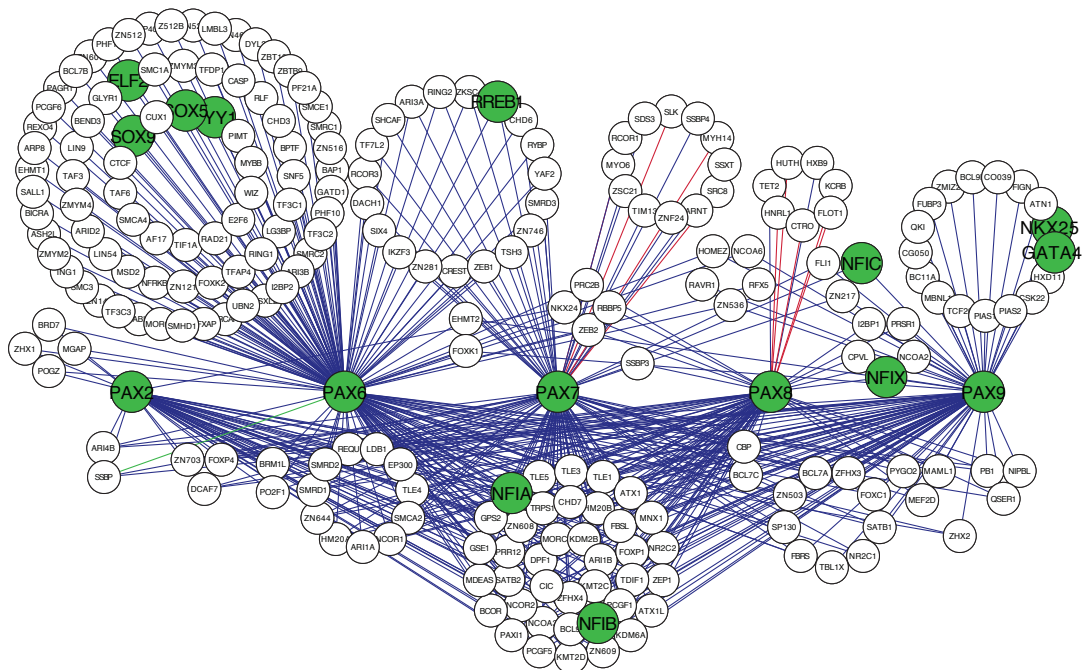

**Supplementary Figure 2. Protein-protein interactions of studied NFIs and PAXs.** **a** AP-MS and BioID interactions of NFI family TFs. **b** AP-MS and BioID interactions of five PAX -TFs studied. Green nodes indicate the baits studied and the white nodes the interacting prey proteins. BioID interactions are shown with blue edges, AP-MS interactions with red edges and interactions detected in both methods with green edges. Source data of the figure are provided as a Source Data file.

# $\alpha$ V5 WB

# $\alpha$ HA WB

## a Co-IP

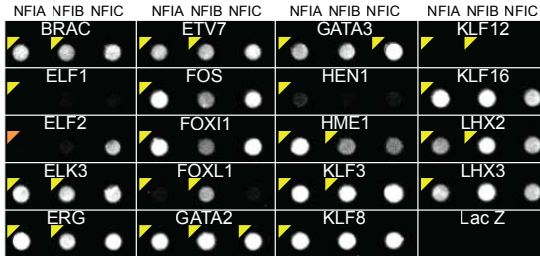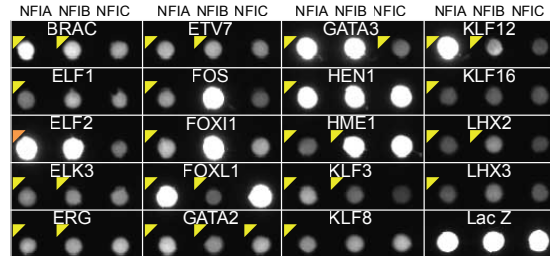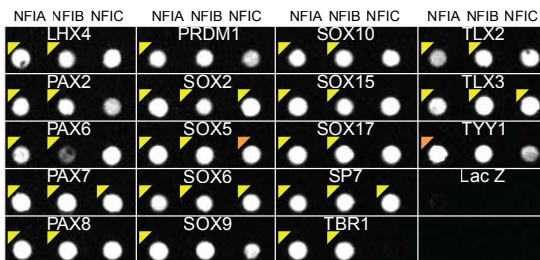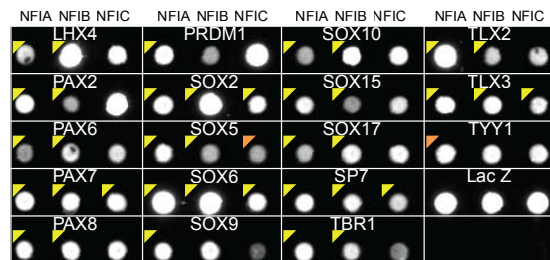

## b Lysate

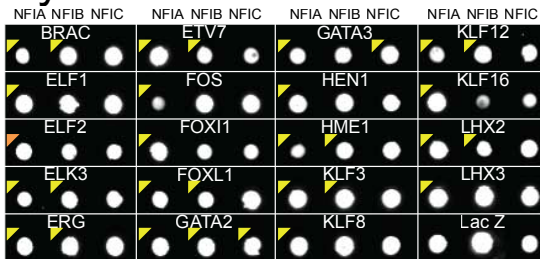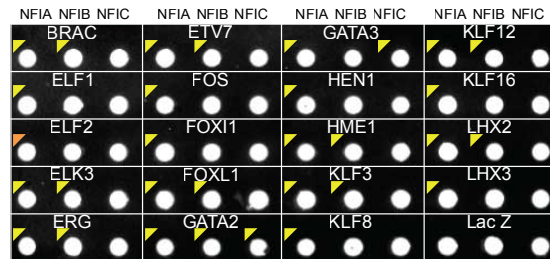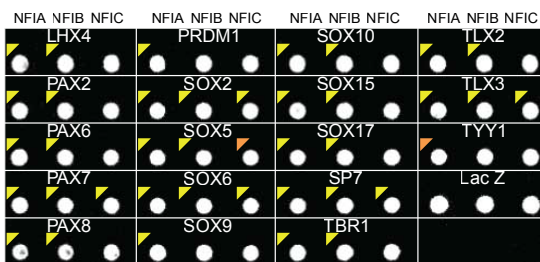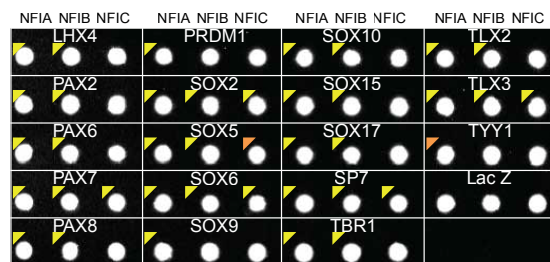

**Supplementary Figure 3. Validation of NFI family TF-TF interactions, detected by mass spectrometry, using co-immunoprecipitation and dot blotting.** HEK293 cells were co-transfected with one of the corresponding strep-HA-tagged NFIA, NFIB or NFIC and one of the 37 TFs tagged with V5-epitope. These 37 TFs were detected as high-confidence interactors for minimally with one of the NFI family members either as a prey or bait in our interaction analyses (BioID or AP-MS). **a** Dot blot detection, with anti-HA and anti-V5 antibodies, of the samples after Co-IP. **b** Dot blot detection, with HA and V5 antibodies, of the lysate. The pair-wise combinations which validated the high-confidence interactions detected with BioID or AP-MS are highlighted with yellow. Additionally, novel interactions of TFs with NFI family members are shown with orange. V5-tagged Lac Z was used as a negative control. Source data of the figure are provided as a Source Data file.

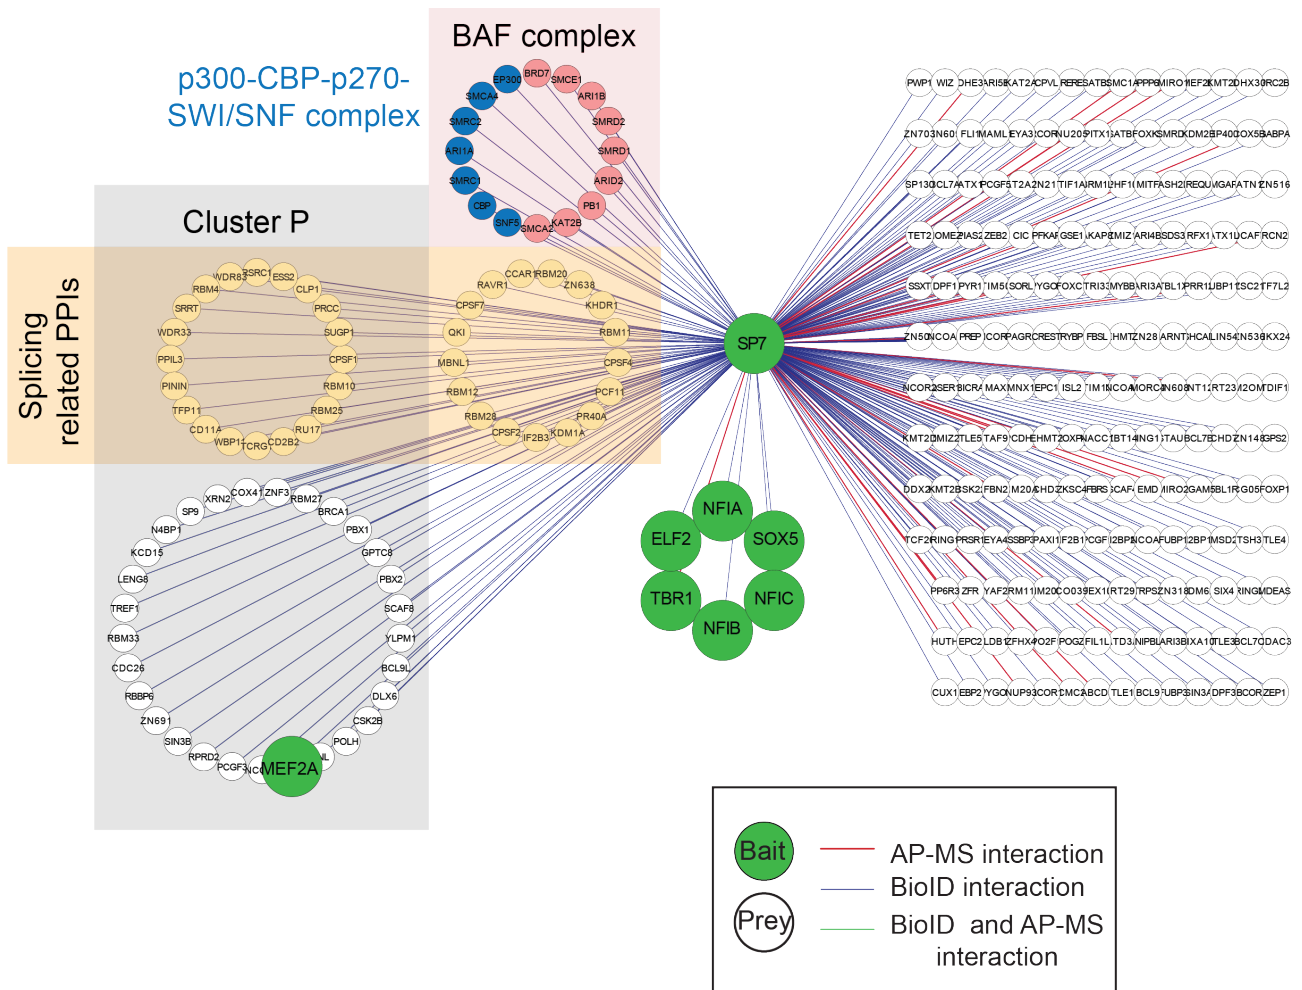

**Supplementary Figure 4.** In addition to splicing-related interactions in Clusters P and Q, we found that SP7 interacted with EP300 (p300) along with other members of the p300-CBP-p270-SWI/SNF and BAF complexes. BioID interactions are shown with blue edges, AP-MS interactions with red edges and interactions detected in both methods with green edges. Source data of the figure are provided as a Source Data file.
