# Supplementary material for: Human transcription factor protein interaction networks
Source: PubMed Central journal article supplement (PMC8828895; doi:10.1038/s41467-022-28341-5), 2022-02-09
Supplement: 41467_2022_28341_MOESM10_ESM.pdf [file 41467_2022_28341_MOESM10_ESM.pdf]

**Title: Supplementary Data 1.**

**Description:** 1A109 selected human transcription factors for the protein-protein interaction analysis using AP-MS and BioID- methods.

**1B.** High-confidence human TF protein-protein interactions (PPIs) identified with BioID-method.

**1C.** High-confidence human TF protein-protein interactions (PPIs) identified with AP-MS-method.

**Title: Supplementary Data 2.**

**Description:** Subcellular localization data of BioID preys.

**Title: Supplementary Data 3.**

**Description:** Summary protein-protein interactions (PPIs) for each TF family identified by BioID-method.

**Title: Supplementary Data 4.**

**Description:** Gene Ontology Biological Process (GO-BP) enrichment analyses of identified prey proteins by DAVID Bioinformatics Resources.

**Title: Supplementary Data 5.**

**Description:** General transcription factors, SAGA complex members and Pol-II components interacting with studies TFs.

**Title: Supplementary Data 6.**

**Description:** The TF prey-prey correlation analysis using ProHits-Viz revealed 17 biological clusters
